# Supplementary material
Source: PubMed Central journal article supplement (PMC1167551)
Supplement: plntcell_tpc.105.031229_1.pdf [file plntcell_tpc.105.031229_1.pdf]

**Table S1.** Coordination shell of the Mg<sup>2+</sup> ion in the different SPP-ligand complexes. As described in the text, Mg<sup>2+</sup> ions occupy two positions in the complex with sucrose + PO<sub>4</sub>, and the residues involved in the coordination shells in each position are shown separately, <sup>a</sup> catalytic position, <sup>b</sup> non-catalytic position.

| FORM 1              |      |              | FORM 2  |      |              |                      |      |              |                                   |      |              |                     |      |              |
|---------------------|------|--------------|---------|------|--------------|----------------------|------|--------------|-----------------------------------|------|--------------|---------------------|------|--------------|
| Empty               |      |              | Empty   |      |              | Glc                  |      |              | Suc & PO <sub>4</sub>             |      |              | Suc                 |      |              |
| Residue             | Atom | Distance (Å) | Residue | Atom | Distance (Å) | Residue              | Atom | Distance (Å) | Residue                           | Atom | Distance (Å) | Residue             | Atom | Distance (Å) |
| Asp9                | OD2  | 2.2          | Asp9    | OD2  | 2.7          | Asp9                 | OD2  | 2.5          | Asp11 <sup>a</sup>                | O    | 2.6          | Asp9                | OD2  | 2.9          |
| Asp11               | O    | 2.2          | Asp186  | OD1  | 2.6          | Asp186               | OD1  | 2.6          | Asp186 <sup>a</sup>               | OD1  | 2.5          | Asp186              | OD1  | 2.8          |
| Asp186              | OD1  | 2.3          | Ser187  | OG   | 2.7          | Ser187               | OG   | 2.7          | PO <sub>4</sub> <sup>a</sup>      | O2   | 2.6          | Ser187              | OG   | 2.6          |
| H <sub>2</sub> O 40 | O    | 2.3          | Asn189  | OD1  | 2.7          | Asn189               | OD1  | 2.4          | H <sub>2</sub> O 219 <sup>a</sup> | O    | 2.5          | Asn189              | OD1  | 2.5          |
| H <sub>2</sub> O 67 | O    | 2.3          | Asp190  | OD2  | 2.7          | Asp190               | OD2  | 2.6          | Asp9 <sup>b</sup>                 | OD2  | 2.2          | Asp190              | OD2  | 2.5          |
| H <sub>2</sub> O73  | O    | 2.5          |         |      |              | H <sub>2</sub> O 212 | O    | 2.9          | Asp186 <sup>b</sup>               | OD1  | 2.5          | H <sub>2</sub> O 91 | O    | 2.7          |
|                     |      |              |         |      |              |                      |      |              | Ser187 <sup>b</sup>               | OG   | 2.6          |                     |      |              |
|                     |      |              |         |      |              |                      |      |              | Asn189 <sup>b</sup>               | OD1  | 2.5          |                     |      |              |
|                     |      |              |         |      |              |                      |      |              | Asp190 <sup>b</sup>               | OD2  | 2.6          |                     |      |              |
|                     |      |              |         |      |              |                      |      |              | H <sub>2</sub> O 219 <sup>b</sup> | O    | 2.7          |                     |      |              |
